# Supplementary material for: Single-cell RNA-seq analysis revealed the stemness of a specific cluster of B cells in acute lymphoblastic leukemia progression
Source: PeerJ. 2024 Oct 21;12:e18296. doi: 10.7717/peerj.18296 (PMC11505884; doi:10.7717/peerj.18296)
Supplement: Supplemental Information 2 [file peerj-12-18296-s002.xls]

## Sheet: Sheet1
ITEM TO CHECK	IMPORTANCE	CHECKLIST
EXPERIMENTAL DESIGN
Definition of experimental and control groups	E	page8line170-172
Number within each group	E	page8line170-172
Assay carried out by core lab or investigator's lab?	D	Not Applicable
Acknowledgement of authors' contributions	D	Not Applicable
SAMPLE
Description	E	page8-9line179-184
Volume/mass of sample processed	D	Not Applicable
Microdissection or macrodissection	E	page8-9line179-184
Processing procedure	E	page8-9line179-184
If frozen - how and how quickly?	E	page8-9line179-184
If fixed - with what, how quickly?	E	page8-9line179-184
Sample storage conditions and duration (especially for FFPE samples)	E	page8-9line179-184
NUCLEIC ACID EXTRACTION
Procedure and/or instrumentation	E	page8-9line179-184
Name of kit and details of any modifications	E	page8-9line179-184
Source of additional reagents used	D	Not Applicable
Details of DNase or RNAse treatment	E	page8-9line179-184
Contamination assessment (DNA or RNA)	E	page8-9line179-184
Nucleic acid quantification	E	page8-9line179-184
Instrument and method	E	page8-9line179-184
Purity (A260/A280)	D	Not Applicable
Yield	D	Not Applicable
RNA integrity method/instrument	E	page8-9line179-184
RIN/RQI or Cq of 3' and 5' transcripts	E	page8-9line179-184
Electrophoresis traces	D	Not Applicable
Inhibition testing (Cq dilutions, spike or other)	E
REVERSE TRANSCRIPTION
Complete reaction conditions	E	page8-9line179-184
Amount of RNA and reaction volume	E	page8-9line179-184
Priming oligonucleotide (if using GSP) and concentration	E	page8-9line179-184
Reverse transcriptase and concentration	E	page8-9line179-184
Temperature and time	E
Manufacturer of reagents and catalogue numbers	D	Not Applicable
Cqs with and without RT	D*	Not Applicable
Storage conditions of cDNA	D	Not Applicable
qPCR TARGET INFORMATION
If multiplex, efficiency and LOD of each assay.	E	page8-9line179-184
Sequence accession number	E	page8-9line179-184
Location of amplicon	D	Not Applicable
Amplicon length	E	page8-9line179-184
In silico specificity screen (BLAST, etc)	E	page8-9line179-184
Pseudogenes, retropseudogenes or other homologs?	D	Not Applicable
Sequence alignment	D	Not Applicable
Secondary structure analysis of amplicon	D	Not Applicable
Location of each primer by exon or intron (if applicable)	E	page8-9line179-184
What splice variants are targeted?	E	page8-9line179-184
qPCR OLIGONUCLEOTIDES
Primer sequences	E	page8-9line179-184
RTPrimerDB Identification Number	D	Not Applicable
Probe sequences	D**	Not Applicable
Location and identity of any modifications	E	page8-9line179-184
Manufacturer of oligonucleotides	D	Not Applicable
Purification method	D	Not Applicable
qPCR PROTOCOL
Complete reaction conditions	E	page8-9line179-184
Reaction volume and amount of cDNA/DNA	E	page8-9line179-184
Primer, (probe), Mg++ and dNTP concentrations	E	page8-9line179-184
Polymerase identity and concentration	E	page8-9line179-184
Buffer/kit identity and manufacturer	E	page8-9line179-184
Exact chemical constitution of the buffer	D	Not Applicable
Additives (SYBR Green I, DMSO, etc.)	E	page8-9line179-184
Manufacturer of plates/tubes and catalog number	D	Not Applicable
Complete thermocycling parameters	E	page8-9line179-184
Reaction setup (manual/robotic)	D	Not Applicable
Manufacturer of qPCR instrument	E	page8-9line179-184
qPCR VALIDATION
Evidence of optimisation (from gradients)	D	Not Applicable
Specificity (gel, sequence, melt, or digest)	E	page8-9line179-184
For SYBR Green I, Cq of the NTC	E	page8-9line179-184
Standard curves with slope and y-intercept	E	page8-9line179-184
PCR efficiency calculated from slope	E	page8-9line179-184
Confidence interval for PCR efficiency or standard error	D	Not Applicable
r2 of standard curve	E	page8-9line179-184
Linear dynamic range	E	page8-9line179-184
Cq variation at lower limit	E	page8-9line179-184
Confidence intervals throughout range	D	Not Applicable
Evidence for limit of detection	E	page8-9line179-184
If multiplex, efficiency and LOD of each assay.	E	page8-9line179-184
DATA ANALYSIS
qPCR analysis program (source, version)	E	page8-9line179-184
Cq method determination	E	page8-9line179-184
Outlier identification and disposition	E	page8-9line179-184
Results of NTCs	E	page8-9line179-184
Justification of number and choice of reference genes	E	page8-9line179-184
Description of normalisation method	E	page8-9line179-184
Number and concordance of biological replicates	D	Not Applicable
Number and stage (RT or qPCR) of technical replicates	E	page8-9line179-184
Repeatability (intra-assay variation)	E	page8-9line179-184
Reproducibility (inter-assay variation, %CV)	D	Not Applicable
Power analysis	D	Not Applicable
Statistical methods for result significance	E	page8-9line179-184
Software (source, version)	E	page8-9line179-184
Cq or raw data submission using RDML	D	Not Applicable
Table 1. MIQE checklist for authors, reviewers and editors. All essential information (E) must be submitted with the manuscript. Desirable
information (D) should be submitted if available. If using primers obtained from RTPrimerDB, information on qPCR target, oligonucleotides,
protocols and validation is available from that source.
*: Assessing the absence of DNA using a no RT assay is essential when first extracting RNA. Once the sample has been validated as
RDNA-free, inclusion of a no-RT control is desirable, but no longer essential.
**: Disclosure of the probe sequence is highly desirable and strongly encouraged. However, since not all commercial pre-designed assay
vendors provide this information, it cannot be an essential requirement. Use of such assays is advised against.
